# Supplementary material
Source: PubMed Central journal article supplement (PMC2709382)
Supplement: supp_M109.018325_jbc.M109.018325-1.pdf [file supp_M109.018325_jbc.M109.018325-1.pdf]

Table 1. Forward and reverse primers used in RT-qPCR

| <b>Gene</b>           | <b>Accession number</b> | <b>Primer pair</b>                                                   |
|-----------------------|-------------------------|----------------------------------------------------------------------|
| murine $\beta$ -actin | NM_007393               | 5' - TGAAATAAGTGGTTACAGGAAGTC-3'<br>5' - GCAGTACATAATTTACACAGAAGC-3' |
| human $\beta$ -actin  | NM_001101               | 5' - CGCCGCCAGCTCACCATG-3'<br>5' - CACGATGGAGGGGAAGACGG-3'           |
| murine Bip            | NM_022310               | 5'-GAGCGTCTGATTGGCGATGC-3'<br>5'-TTCCAAGTGCGTCCGATGAGG-3'            |
| human BiP             | NM_005347               | 5'-GCACAGACAGAT TGACCTATT3'<br>5'-GTAGCACAGGAGCACAGC-3'              |
| murine CHOP           | NM_007837               | 5'-GAGCTGGAAGCCTGGTATGAG-3'<br>5'-TGTGCGTGTGACCTCTGTTGG-3'           |
| human CHOP            | NM_004083               | 5'-CACTCTCCAGATTCCAGTCAG-3'<br>5'-AGCCGTTTATTCTCTTCAGC-3'            |
| murine Herpud1        | NM_022331               | 5'-GGAGCCAATCAGAACTTGCG-3'<br>5'-ATAGGTCCAATCCAACCAGTCTCG-3'         |
| human Herpud1         | NM_001010989            | 5'-CTAGATGGCGAGCAGACC-3'<br>5'-GAGTCAGGTGATCCAGTCC-3'                |
| murine Lyric          | NM_026002               | 5'-CTCTCGGGCTGCTCCTGCTCTTC-3'<br>5'-GGCGGGCTCCTTCGCTTCTTGCG-3'       |
| human Lyric           | NM_178812               | 5'-ACCGAGCAACTTACAACCGCATC-3'<br>5'-CATTCCAGCCTCCTCCATTGACAG-3'      |
| murine Rrs1           | NM_021511               | 5'-GCAAGTATTGTAAATGGATGCAG-3'<br>5'-TCTCAAGCACACTCCATATTG-3'         |
| human Rrs1            | NM_015169               | 5'-CGTGGTTATGCTGCCG-3'<br>5'-CTCGGCTCACTCGCTT-3'                     |
