# Supplementary material
Source: PubMed Central journal article supplement (PMC2709382)
Supplement: supp_M109.018325_jbc.M109.018325-2.pdf [file supp_M109.018325_jbc.M109.018325-2.pdf]

Table 2. Normalized mRNA expression values of BiP, CHOP, Herpud1, Rrs1 and Lyric are indicated for each control (C) and affected (HD) postmortem brain. CAG allele size, age at death and sex of control and HD individuals are also reported.

| Sample | CAG allele size | Age at death | Sex | Normalized mRNA expression values |             |             |             |             |
|--------|-----------------|--------------|-----|-----------------------------------|-------------|-------------|-------------|-------------|
|        |                 |              |     | BiP                               | CHOP        | Herpud1     | Rrs1        | Lyric       |
| C 1    | 25/17           | 74           | M   | 0,52 ± 0,03                       | 0,96 ± 0,08 | 0,50 ± 0,06 | 0,52 ± 0,04 | 0,50 ± 0,04 |
| C 2    | 21/21           | 76           | F   | 0,55 ± 0,05                       | 1,27 ± 0,17 | 0,68 ± 0,06 | 0,97 ± 0,03 | 0,60 ± 0,12 |
| C 3    | 18/18           | 79           | M   | 0,48 ± 0,01                       | 1,02 ± 0,06 | 1,01 ± 0,00 | 0,79 ± 0,02 | 0,83 ± 0,13 |
| C 4    | 20/18           | 72           | M   | 0,41 ± 0,01                       | 0,65 ± 0,05 | 0,57 ± 0,06 | 0,57 ± 0,04 | 0,65 ± 0,15 |
|        |                 |              |     |                                   |             |             |             |             |
| HD 1   | 41/18           | 75           | M   | 1,00 ± 0,00                       | 0,99 ± 0,01 | 0,99 ± 0,01 | 0,69 ± 0,20 | 1,00 ± 0,00 |
| HD 2   | 42/23           | 64           | M   | 1,14 ± 0,01                       | 2,99 ± 0,45 | 1,21 ± 0,10 | 1,67 ± 0,20 | 1,30 ± 0,15 |
| HD 3   | 43/17           | 71           | M   | 1,68 ± 0,07                       | 2,14 ± 0,17 | 2,25 ± 0,02 | 2,00 ± 0,25 | 1,01 ± 0,15 |
| HD 4   | 43/17           | 70           | M   | 0,88 ± 0,01                       | 2,15 ± 0,03 | 1,83 ± 0,07 | 1,96 ± 0,28 | 1,01 ± 0,12 |
| HD 5   | 41/37           | 70           | M   | 0,62 ± 0,01                       | 1,29 ± 0,15 | 1,12 ± 0,05 | 1,32 ± 0,19 | 1,02 ± 0,07 |
